# Supplementary material for: UV imaging reveals facial areas that are prone to skin cancer are disproportionately missed during sunscreen application
Source: PubMed Central journal article supplement (PMC5624581; doi:10.1371/journal.pone.0185297), 2017-10-02
Supplement: pone.0185297.s001.pdf [file pone.0185297.s001.pdf]

Sunscreen Experiment; Pre-trial Questionnaire

1. Have you ever applied sunscreen before? YES  NO
2. Do you prefer using sun cream or sun spray? Cream  Spray  No Preference
- Reason for preference; .....
3. Do you have any allergies (to sunscreens) YES  NO
4. Do you apply face moisturizer? YES  NO
- 4b. If so, do you know whether it contains any sun protective factor? YES  NO  SPF: ..... NO SPF
