# Supplementary material for: UV imaging reveals facial areas that are prone to skin cancer are disproportionately missed during sunscreen application
Source: PubMed Central journal article supplement (PMC5624581; doi:10.1371/journal.pone.0185297), 2017-10-02
Supplement: pone.0185297.s002.pdf [file pone.0185297.s002.pdf]

Sunscreen Experiment; Post-trial Questionnaire

1. What did you think of the instructions provided?

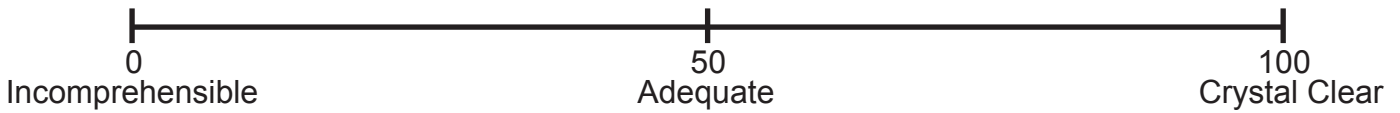

Can you please explain your ranking of the instructions

.....

2. How did you find the application of the sun tan CREAM to the eyelids?

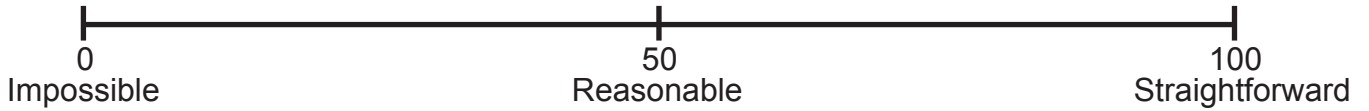

3. How did you find the application of the sun tan SPRAY to the eyelids?

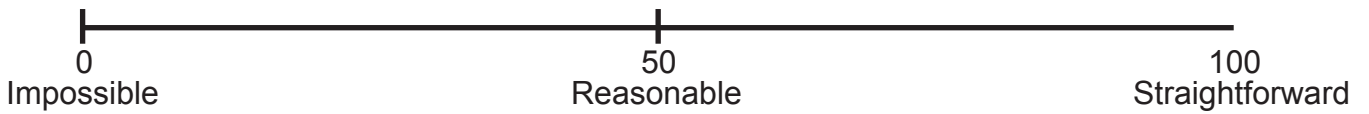

4. Which application method did you think was most effective?

- Cream
- Spray
- Both the same

Why? .....

5. When using the sun tan CREAM did you experience any post-application stinging in and around the eyes? If so, for how long?

- Yes  How long? .....
- No

6. When using the sun tan SPRAY did you experience any post-application stinging in and around the eyes? If so, for how long?

- Yes  How long? .....
- No

7. Did the change in instructions affect the way in which you applied the sunscreen/spray? Please explain your answer.

- Yes  Why? .....
- No

8. If you didn't fully apply sunscreen/spray to the eyelids initially, was there a reason why? Please explain your answer.

- Yes  Why? .....
- No
